# Supplementary material
Source: MDPI journal article supplement (https://www.mdpi.com/1999-4907/9/1/1)
Supplement: s1 [file s1]

## Workflow

a.

b.

c.

Tree chronologies  
exported from  
Windendro (x12)

1.  
Yux  
(DPL)

Chronologies  
converted to excel  
format and  
shortened to 1880

2.  
dplr

Chronologies  
detrended (67 yr  
spline) and pre-  
whitened

d.

e.

f.

3.  
tbrm()

Master  
chronologies  
created (x12)

4.  
treeclim

Climate data from  
Climate WNA (x12)  
+ files with influential  
variables (x4)

5.  
dredge()

Import-  
ance  
values  
(Table 1)

g.

h.

i.

6.  
lm()

Output from  
multiple linear  
regression (x12)

7.  
t-test

Output  
from t-tests

8.  
Model  
selection

Output  
(Table 2)

Legend =

Program/code

Output files
